# Supplementary material for: Cationic Single-Chained Surfactants with a Functional Group at the End of the Hydrophobic Tail DNA Compacting Efficiency
Source: MDPI journal article supplement (doi:10.3390/pharmaceutics13040589), 2021-04-20
Supplement: s1 [file s1]

# Supplementary Materials: Cationic Single-Chained Surfactants with a Functional Group at the End of the Hydrophobic Tail DNA Compacting Efficiency

José Antonio Lebrón Pilar López-Cornejo Elena García-Dionisio Pablo Huertas Margarita García-Calderón María Luisa Moyáa Francisco José Ostos and Manuel López-López

**Table S1.** Values of the critical micellar concentration of the surfactants investigated in this work, taken from refs. 47–49. The cmcs were determined by conductivity.

| Surfactant | DTEABr     | 12PhBr    | 12NBr         | 11PyBr <sup>a</sup> |
|------------|------------|-----------|---------------|---------------------|
| cmc/mM     | 14.3 ± 0.4 | 3.7 ± 0.2 | 0.641 ± 0.015 | ---                 |

<sup>a</sup>This surfactant does not self-aggregate.

**Citation:** Lebrón, J.A.; López-Cornejo, P.; García-Dionisio, E.; Huertas, P.; García-Calderón, M.; Moyá, M.L.; Ostos, F.J.; Cationic Single-Chained Surfactants with a Functional Group at the End of the Hydrophobic Tail DNA Compacting Efficiency. *Pharmaceutics* **2021**, *13*, 589. <https://doi.org/10.3390/pharmaceutics13040589>

Academic Editors: Gert Fricker and Ian S. Blagbrough

Received: 23 February 2021

Accepted: 15 April 2021

Published: 20 April 2021

**Publisher's Note:** MDPI stays neutral with regard to jurisdictional claims in published maps and institutional affiliations.

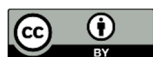

**Copyright:** © 2021 by the authors. Licensee MDPI, Basel, Switzerland. This article is an open access article distributed under the terms and conditions of the Creative Commons Attribution (CC BY) license (<http://creativecommons.org/licenses/by/4.0/>).

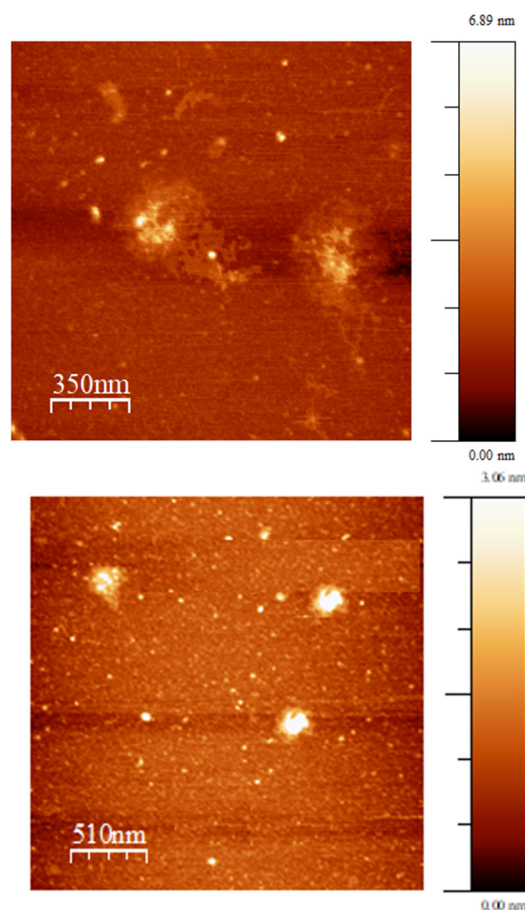

**Figure S1.** AFM topographic images of 12PhBr/ctDNA buffered solutions, in 10 mM HEPES (pH = 7.4), adsorbed on APTES modified mica surface. [ctDNA] = 0.6 µM. **A)** N/P = 9; **B)** N/P =

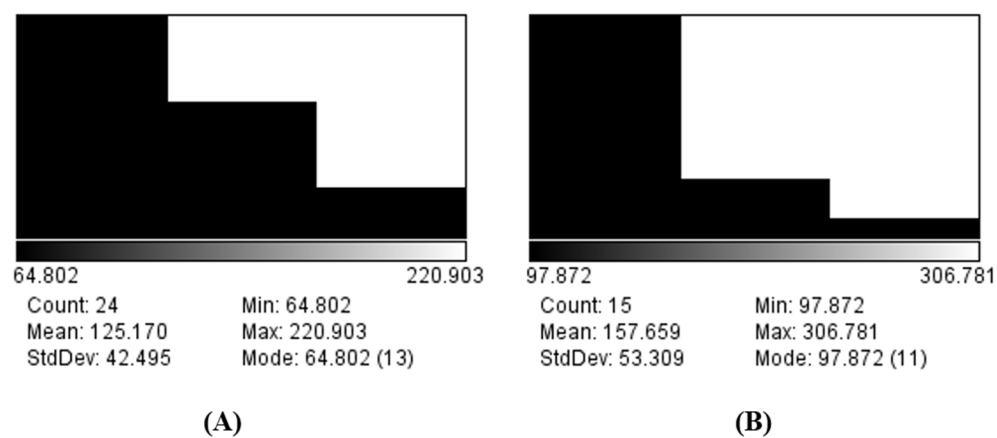

25.

**Figure S2.** Histograms generated using the size distribution tool of the ImageJ bundled with 64-bit Java 1.8.0\_172 software of the TEM microscope for: **(A)** liposomes at  $\alpha = 0.7$ , and **(B)** lipoplexes at  $\alpha = 0.7$  and  $L/D = 8$ .
